# Supplementary material for: Stage and continuum approaches in prehistoric biface production: A North American perspective
Source: PLoS One. 2017 Mar 21;12(3):e0170947. doi: 10.1371/journal.pone.0170947 (PMC5360224; doi:10.1371/journal.pone.0170947)
Supplement: S1 Table — (XLSX) [file pone.0170947.s001.xlsx]

## Sheet: Sheet1
Source	Stage	length	width	thickness	weight
Callahan	1	142	79	24	315
Callahan	1	106	64	22
Callahan	1	136	65	25	255
Callahan	1	119	66	20	160
Callahan	1	158	88	15	220
Callahan	1	123	90	22	250
Callahan	1	103	59	19	105
Callahan	1	137	66	18	150
Callahan	1	103	103	22	240
Callahan	1	124	63	16	130
Callahan	2	108	63	25	145
Callahan	2	123	82	21	260
Callahan	2	126	70	24	220
Callahan	2	123	58	18	160
Callahan	2	94	68	22	140
Callahan	2	99	78	27
Callahan	2	114	65	21	150
Callahan	2	130	87	21	225
Callahan	2	106	59	23	125
Callahan	2	112	54	12	85
Callahan	2	98	50	12	55
Callahan	2	147	47	30
Callahan	3	108	67	23	150
Callahan	3	132	59	16	120
Callahan	3	100	53	15	90
Callahan	3	102	63	17	85
Callahan	3	114	75	18	150
Callahan	3	91	51	14	90
Callahan	3	87	55	10	60
Callahan	3	131	72	17	230
Callahan	3	113	63	17	125
Callahan	3	97	56	14	90
Callahan	3	93	53	19	90
Callahan	3	97	65	17	110
Callahan	3	133	61	22	200
Callahan	3	82	59	13	70
Callahan	3	65	40	9	30
Callahan	3	128	54	15	110
Callahan	3	101	36	9	40
Callahan	3	87	35	8	35
Callahan	4	103	47	12	70
Callahan	4	93	45	8	45
Callahan	4	117	58	11	85
Callahan	4	113	49	12	80
Callahan	4	119	50	11	80
Callahan	4	130	53	13	110
Callahan	4	93	42	10	50
Callahan	4	74	41	9	40
Callahan	4	83	58	11	60
Callahan	4	88	55	11	60
Callahan	4	101	50	10	65
Callahan	4	120	46	15	90
Callahan	4	100	46	14	65
Callahan	4	96	43	12	55
Callahan	4	74	38	9	35
Callahan	4	92	38	12	45
Callahan	4	76	43	11	40
Callahan	4	91	44	12	60
Callahan	4	109	56	15	85
Callahan	4	97	41	11	45
Callahan	4	116	67	12	115
Callahan	4	119	85	8	125
Callahan	4	117	64	8	110
Callahan	4	120	52	11	65
Callahan	4	66	43	10	35
Callahan	4	113	56	10	80
Callahan	4	108	57	10	75
Callahan	4	128	64	10	90
Callahan	4	135	48	12	85
Callahan	4	100	60	13	95
Callahan	4	83	52	9	45
Callahan	4	94	70	10	80
Callahan	4	135	76	10	110
Adams	1	103	109	56	551
Adams	1	74	85	22	133
Adams	1	112	65	22	174
Adams	1	90	64	27	121
Adams	1	103	73	25	172
Adams	1	54	76	17	57
Adams	1	91	72	15	102
Adams	1	77	64	27	127
Adams	1	65	69	40	176
Adams	1	95	72	38	244
Adams	1	40	70	18	56
Adams	1	144	76	24	268
Adams	1	125	73	30	285
Adams	1	88	76	24	160
Adams	1	78	82	20	122
Adams	1	82	33	37	181
Adams	1	86	66	33	188
Adams	1	53	85	40	190
Adams	1	54	76	50	383
Adams	1	118	63	32	296
Adams	2		88	40
Adams	2	98	60	28	162
Adams	2		68	24
Adams	2	77	46	17	60
Adams	2	71	44	21	65
Adams	2		49	15
Adams	2	75	70	17	96
Adams	2	97	44	29	148
Adams	2	98	54	21	116
Adams	2	88	46	22	80
Adams	2	88	55	21	96
Adams	2	78	70	24	123
Adams	2	98	60	24	122
Adams	2	106	59	42	229
Adams	2	69	62	32	128
Adams	2		42	43
Adams	2	76	49	30	97
Adams	2	60	48	20	45
Adams	2		45	32
Adams	2		50	20
Adams	2	112	68	50	292
Adams	2		46	12
Adams	2	65	48	16	58
Adams	2		41	17
Adams	2	84	55	23	111
Adams	2	89	60	18	99
Adams	2	76	36	15	50
Adams	2	75	40	16	44
Adams	2	102	85	31	317
Adams	2	95	64	27	171
Adams	2		108	47
Adams	2	110	68	28	163
Adams	3	85	47	18	79
Adams	3		41	14
Adams	3		43	12
Adams	3		47	12
Adams	3		45	12
Adams	3		47	10
Adams	3	84	38	12	45
Adams	3		31	10
Adams	3		48	14
Adams	3		53	17
Adams	3		54	20
Adams	3		61	18
Adams	3		58	14
Adams	3		48	14
Adams	3		47	9
Adams	3		52	14
Adams	3		41	11
Adams	3		72	13
Adams	3		58	14
Adams	3		44	9
Adams	3		73	17
Adams	3		54	14
Adams	3		61	12
Adams	3		58	12
Adams	3		50	33
Adams	3	76	38	14	40
Adams	3	73	42	14	45
Adams	3	91	38	11	43
Adams	3		41	13
Adams	3	137	67	19	168
Thunderbird	2	71	39	7	26
Thunderbird	2	77	42	18	59
Thunderbird	2	54	38	11	27
Thunderbird	2	61	48	13	46
Thunderbird	2	58	45	19	57
Thunderbird	2	66	48	16	56
Thunderbird	2	83	75	20	119
Thunderbird	2	60	51	18	58
Thunderbird	2	62	48	17	50
Thunderbird	2	71	46	15	58
Thunderbird	1	120	85	32	311
Thunderbird	2	68	40	9	26
Thunderbird	2	86	64	21	126
Thunderbird	2	73	60	25	98
Thunderbird	2	80	61	22	118
Thunderbird	2	80	46	21	70
Thunderbird	2	104	73	29	206
Thunderbird	2	167	76	35	420
Thunderbird	2	67	57	21	84
Thunderbird	2	67	44	26	65
Gault	2	88	68	23	232
Gault	3	109	67	32	196
Gault	3	140	56	22	131
Gault	3	126	53	16	125
Gault	2	101	49	25	123
Gault	2	131	75	48	451
Gault	2	134	55	21	146
Gault	2	160	87	46	597
Gault	2	137	76	38	362
Gault	3	104	73	28	207
Gault	2	114	71	23	196
Gault	3	120	68	19	116
Gault	3	120	60	19	124
Gault	3	123	73	21	207
Gault	3	107	55	24	136
Gault	2	133	83	38	431
Pelegrin & Ch.	2	100	40	10	57
Pelegrin & Ch.	2	220	63	13	566
Pelegrin & Ch.	2	150	47	13	107
Pelegrin & Ch.	2	144	42	10	77
Pelegrin & Ch.	2	121	44	9	56
Pelegrin & Ch.	2	172	57	12	137
Pelegrin & Ch.	2	108	45	10	50
Pelegrin & Ch.	2	147	49	10	86
Pelegrin & Ch.	2	128	43	11	74
Pelegrin & Ch.	2	130	44	10	71
Pelegrin & Ch.	2
Pelegrin & Ch.	2
Pelegrin & Ch.	2
Pelegrin & Ch.	3	100	37	10	42
Pelegrin & Ch.	3	220	48	15	255
Pelegrin & Ch.	3	149	39	11	68
Pelegrin & Ch.	3	141	35	9	56
Pelegrin & Ch.	3	122	35	9	43
Pelegrin & Ch.	3	169	37	9	74
Pelegrin & Ch.	3	106	38	9	39
Pelegrin & Ch.	3	147	36	9	54
Pelegrin & Ch.	3	127	33	9	51
Pelegrin & Ch.	3	128	35	9	47
Pelegrin & Ch.	4	140	30	9	33
Pelegrin & Ch.	4	121	30	8	28
Pelegrin & Ch.	4	169	32	11	54
Pelegrin & Ch.	4	106	37	9	30
Pelegrin & Ch.	4
Pelegrin & Ch.	4
Pelegrin & Ch.	4	127	31	8	31
Pelegrin & Ch.	4	128	29	10	35
Pelegrin & Ch.	4	146	29	11	46
Pelegrin & Ch.	4	140	32	9	41
